# Supplementary material for: Brucein D suppresses breast cancer proliferation and migration via targeting the FAK/LRG1 signaling pathway
Source: Research Square preprint supplement (doi:10.21203/rs.3.rs-7260667/v1), 2025-08-20
Supplement: Supplementary file 1 [file 4e1a3381a24a72f08ab78569.docx]

Figure 1F

E-cadherin


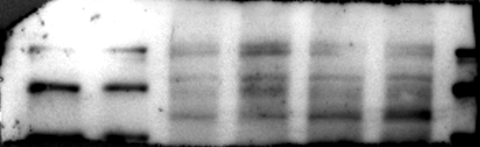
 135 kDa

Snail


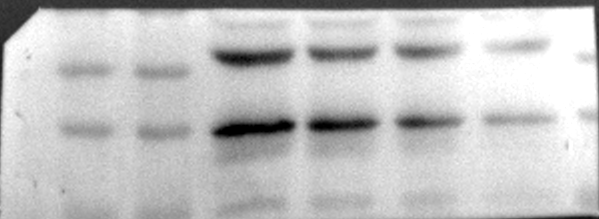
 29 kDa

GAPDH


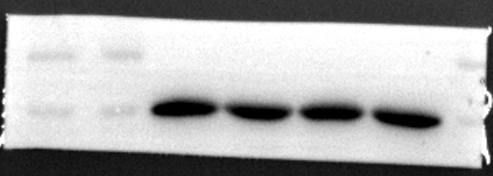
 37 kDa

E-cadherin


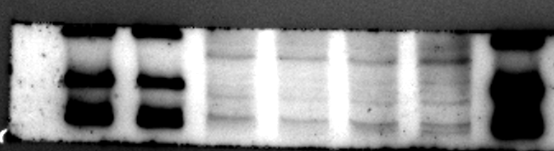
 135 kDa

Snail


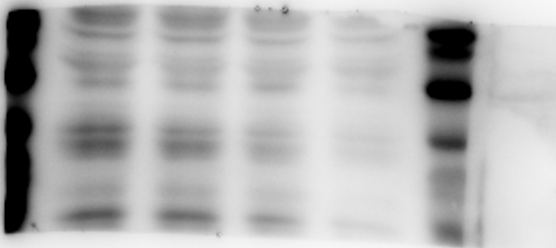
29 kDa

GAPDH


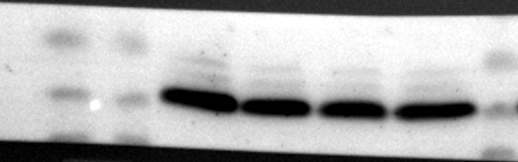
 37 kDa

Figure 3E and 3F

BAX


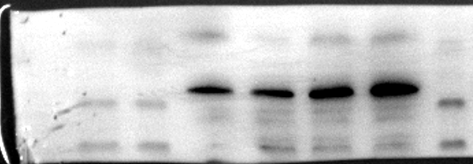
 21 kDa

Bcl2


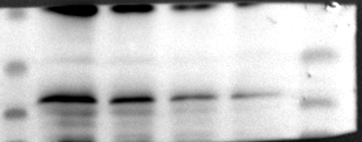
 27 kDa

Cleaved-caspase 3


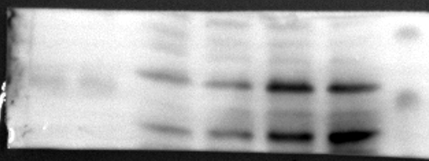
 17 kDa

GAPDH


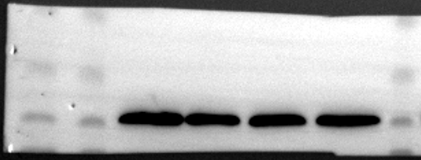
 37 kDa

BAX


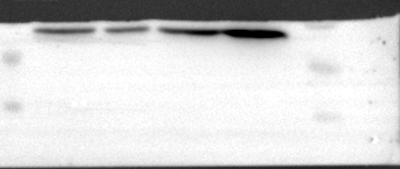
 21 kDa

BCl2


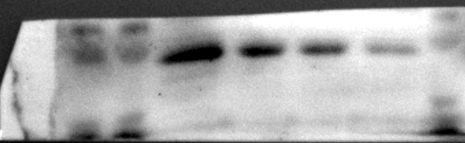
 27 kDa

Cleaved caspase 3


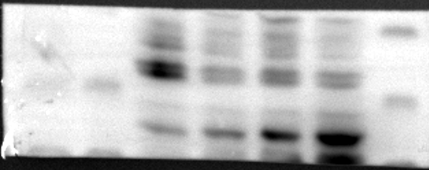
 17 kDa

GAPDH


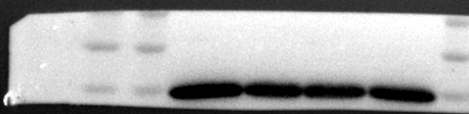
 37 kDa

Figure 4E

FAK


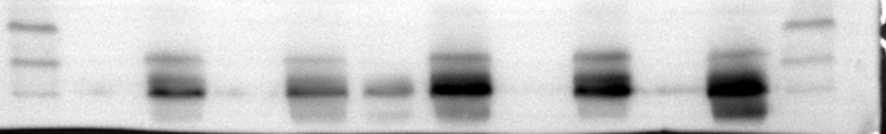
 125 kDa

GAPDH


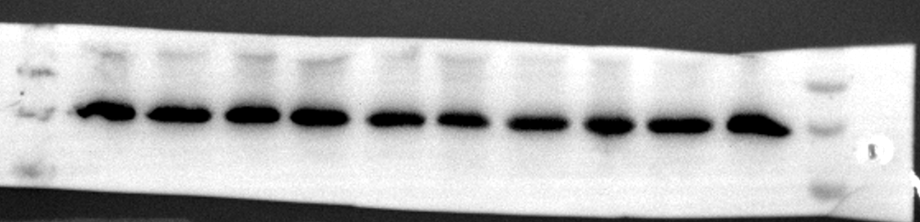
 37 kDa

Figure 5B

p-FAK


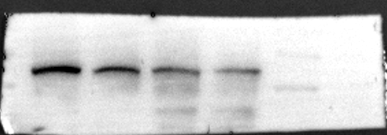
 125 kDa

FAK


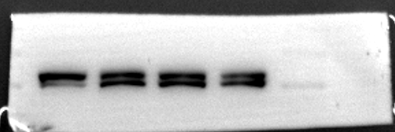
 125 kDa

GAPDH


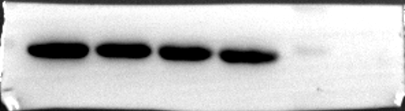
 37 kDa

p-FAK


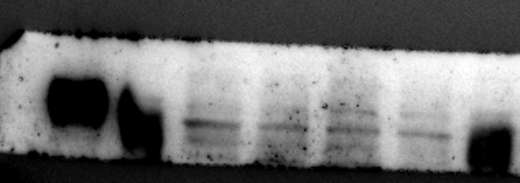
 125 kDa

FAK


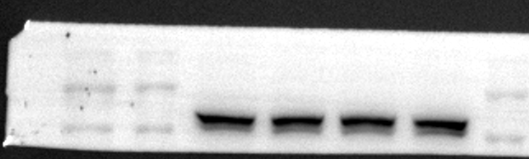
 125 kDa

GAPDH


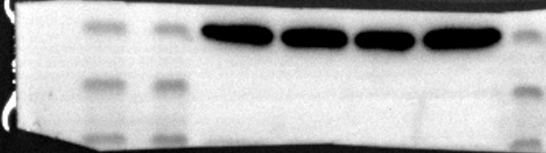
 37 kDa

Figure 5D

MCF7
LRG1


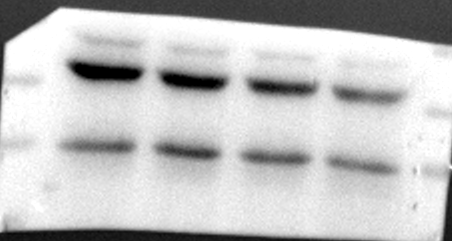
 45 kDa

GAPDH


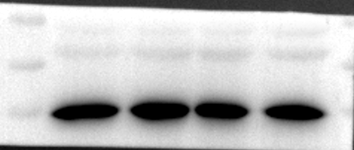
 37 kDa

MDA-MB-231

LRG1


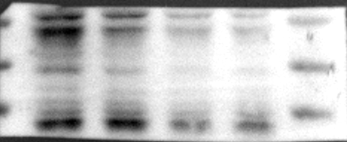
 45 kDa

GAPDH


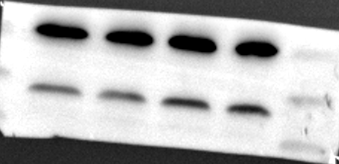
 37 kDa

Figure 5E

MCF7

p-PI3K


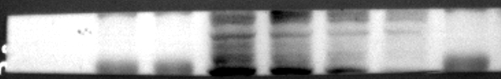
 85 kDa

PI3K


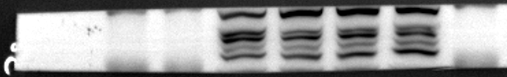
 85 kDa

p-AKT


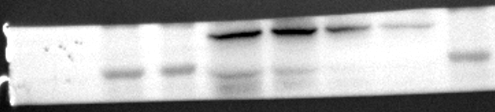
 60 kDa

AKT


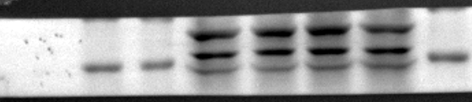
 60 kDa

p-mTOR


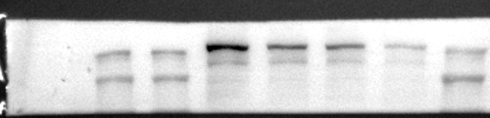
 289 kDa

mTOR


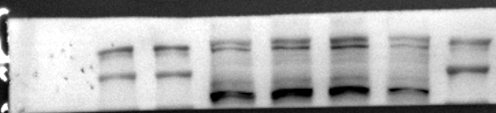
 289 kDa

GAPDH


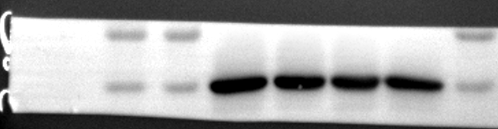
 37 kDa

MDA-MB-231

p-PI3K


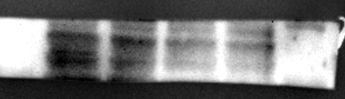
 85 kDa

PI3K


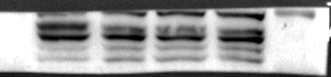
 85 kDa

p-AKT


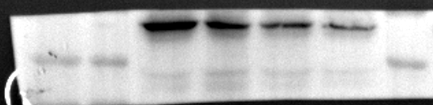
 60 kDa

AKT


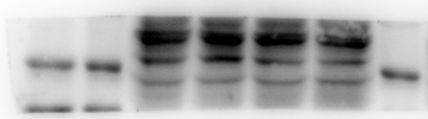
 60 kDa

p-mTOR


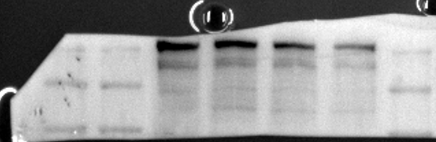
 289 kDa

mTOR


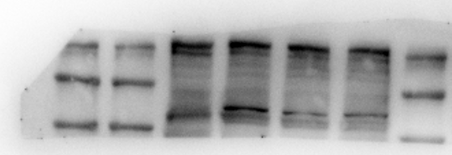
 289 kDa

GAPDH


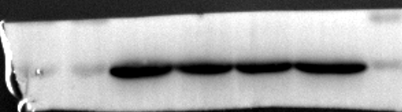
 37 kDa

Figure 6

FAK


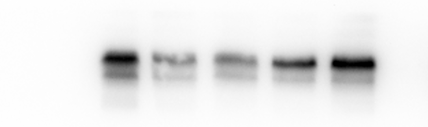
 125 kDa

GAPDH


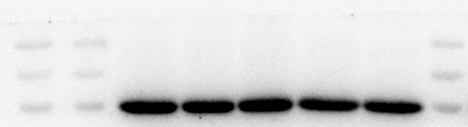
 37 kDa

FAK


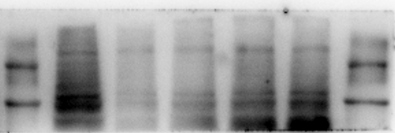
 125 kDa

GAPDH


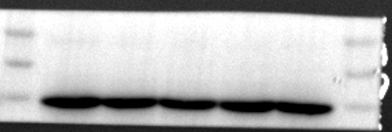
 37 kDa

Figure 6C

BD-FAK


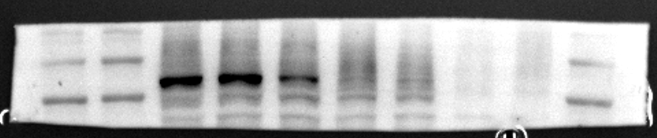
 125 kDa

BD-DMSO


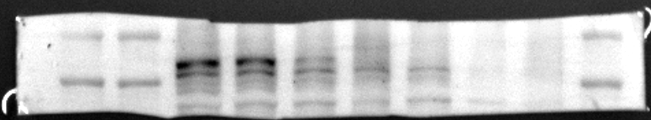
 125 kDa

BD-FAK


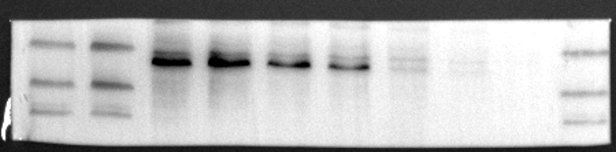
 125 kDa

BD-DMSO


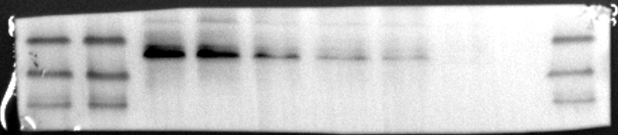
 125 kDa

Figure 6F and 6G

MCF-7

p-FAK


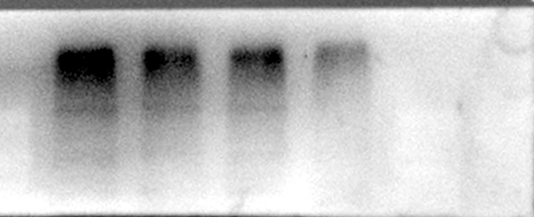
 125 kDa

FAK


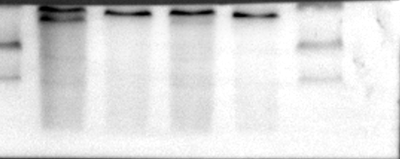
 125 kDa

LRG1


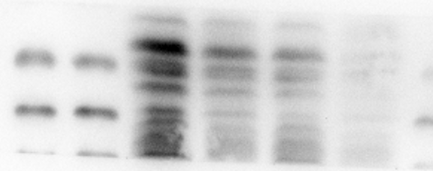
 45 kDa

p-PI3K


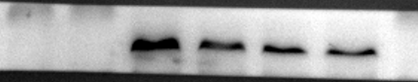
 85 kDa

PI3K


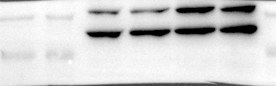
 85 kDa

p-AKT


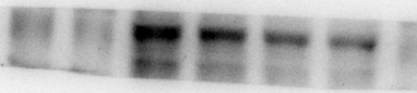
 60 kDa

AKT


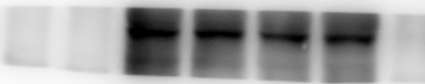
 60 kDa

p-mTOR


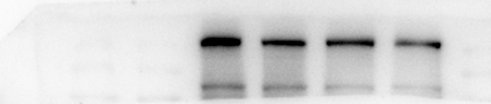
 289 kDa

mTOR


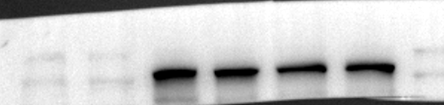
 289 kDa

GAPDH


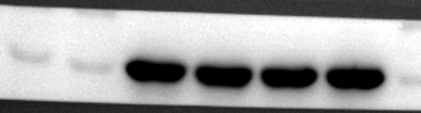
 37 kDa

MDA-MB-231

p-FAK


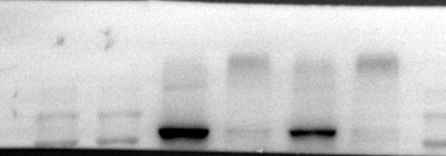
 125 kDa

FAK


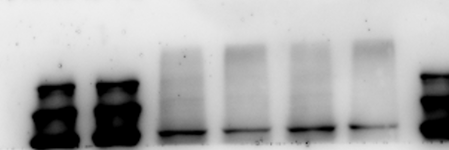
 125 kDa

LRG1


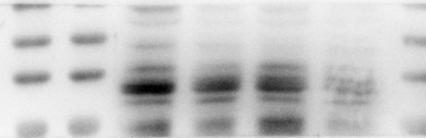
 45 kDa

p-PI3K


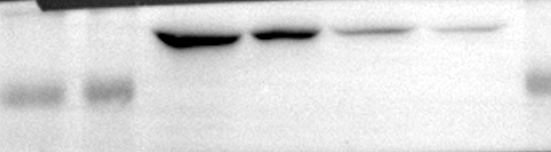
 85 kDa

PI3K


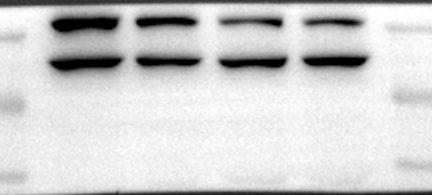
 85 kDa

p-AKT


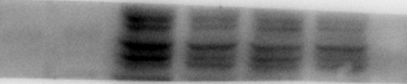
 60 kDa

AKT


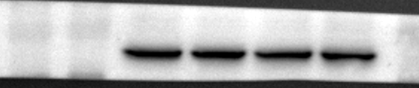
 60 kDa

p-mTOR


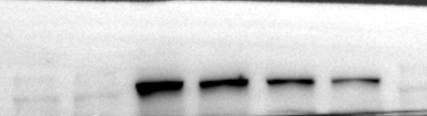
 289 kDa

mTOR


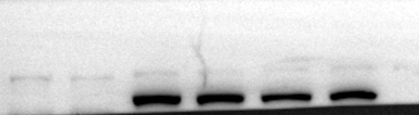
 289 kDa

GAPDH


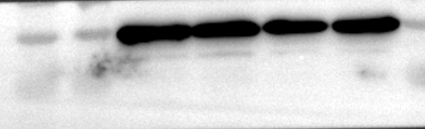
 37 kDa
